# Supplementary material for: Demographics and density estimates of two three-toed box turtle (Terrapene carolina triunguis) populations within forest and restored prairie sites in central Missouri
Source: PeerJ. 2015 Sep 22;3:e1256. doi: 10.7717/peerj.1256 (PMC4582957; doi:10.7717/peerj.1256)
Supplement: Supplemental Information 1 — Morphometric and associated capture data (date, time, transect ID) for box turtles captured over the duration of the study. [file peerj-03-1256-s001.xlsx]

## Sheet: Transect_Turtle_qry
Transect_ID	Date	Time	Age_class	Min_years	Turtle_ID	Car_maxlength	Car_cervicallength	Car_maxwidth	Car_hingewidth	Car_height	Plast_anterior	Plast_posterior	Plast_total	Mass	Car_Mut_Index
BA-05	2007-06-25	10:17:00	2	10	BA0019	151.2	150.35	122.8	112.15	77	60.2	91.8	152	675	0
BA-01	2007-07-30	07:08:00	3		BA0072	141.55	141	113.85	112.7	71.5	57.4	81.9	139.3	590	0
BA-01	2007-05-14	09:41:00	2	10	BA0073	136.6	135.85	103.35	97.75	71	54.9	79.7	134.6	570	0
BA-02	2007-05-14	11:14:00	2	10	BA0149	140.65	140.35	106.4	100.8	72	57.3	86.85	144.15	595	0.167
BA-01	2007-05-14	10:20:00	3		BA0151	146.05	145.7	111.6	102.45	74	62.2	86	148.2	660	0.417
BA-02	2007-05-14	11:44:00	2	10	BA0152	138.9	137.9	105.6	100.9		54.7	79.4	134.1	455	0.083
BA-03	2007-05-14	12:37:00	2	16	BA0153	149.6	148.55	114.75	109.9	73	59.9	90.2	150.1	695	0.083
BA-03	2007-05-14	13:00:00	2	12	BA0154	157.4	150.6	117.9	104.85	70.5	59.65	87.65	147.3	605	0.167
BA-03	2007-05-14	13:00:00	2	14	BA0155	131.5	130.05	103.45	94	69	53.9	80	113.9	505	0.25
BA-04	2007-05-29	09:35:00	1	7	BA0157	125.5	124.6	92.5	89.35	59	50.6	71.95	122.55	325	0
BA-02	2007-06-04	07:48:00	2	12	BA0158	144.1	141.65	111.9	108	73	56.5	88.55	145.05	620	0
BA-02	2007-06-04	08:15:00	2	12	BA0159	140.55	139.35	108.25	103.1	67	59.1	76.6	135.7	518	0
BA-02	2007-06-04	08:40:00	1	6	BA0161	121.7	120.3	92	85.35	58	48.25	68	116.25	322	0
BA-04	2007-06-04	10:15:00	2	12	BA0162	144.8	140.85	115.5	112.65	74.5	60.3	83.8	144.1	615	0
BA-01	2007-06-11	07:17:00	2	12	BA0164	150.95	150.95	115.9	109.75	75	60.95	89.05	150	748	0
BA-01	2007-06-11	07:20:00	2	14	BA0166	154.85	153	118.55	112.25	80.5	63.55	89.95	153.5	805	0.25
BA-03	2007-06-11	09:28:00	2	12	BA0167	128.2	125.3	99.4	94.85	64.5	51.85	80	131.85	470	0
BA-04	2007-06-11	10:00:00	2	10	BA0168	131.15	128.4	105.15	96.3	65	55.65	74.2	129.85	425	0
BA-01	2007-06-19	07:36:00	2	17	BA0170	154.85	152.2	112.15	109.1	76	62.7	89.05	151.75	731	0.167
BA-03	2007-06-04	09:40:00	3	13	BA0171	133.45	132.45	92.3	88.95	64	53.1	76.1	129.2	428	0.333
BA-03	2007-07-02	09:55:00	2	8	BA0173
BA-05	2007-06-19	10:42:00	2	16	BA0174	141.85	139.65	110.95	100.5	71.5	54	78.25	132.25	576	0
BA-04	2007-06-25	09:30:00	2	15	BA0175	148.85	145.7	110.45	107.6	71	59.4	87.75	147.15	620	0.083
BA-05	2007-06-25	10:17:00	2	12	BA0176	149.35	146.55	114	110.4	75	61.7	89	150.7	695	0
BA-05	2007-07-02	11:23:00	2	15	BA0181	135.3	134.25	104.65	101	71	56.7	78.85	135.55	592	0.083
BA-05	2007-07-02	12:02:00	2	10	BA0182	143	140.5	103.6	97.45	66	58.8	78.55	137.35	528	0.167
BA-02	2007-07-09	08:06:00	2	11	BA0184	138.3	136.8	111.85	109.45	71	55.25	87.4	142.65	582	0
BA-02	2007-07-09	08:20:00	1	9	BA0185	114.2	111.3	95	87.45	64	46.6	72.3	118.9	330	0
BA-04	2007-07-09	10:13:00	2	14	BA0186	154.55	153	121.25	111.7	76	62.6	89.4	152	708	0.083
BA-01	2007-07-18	07:27:00	3	16	BA0187	132.65	130.2	102.15	95.9	67.5	54.1	75	129.1	477	0.167
BA-03	2007-07-18	09:01:00	3		BA0188	146.1	144.25	118.05	116.65	74	60.5	87.15	147.65	742	0.333
BA-05	2007-07-18	10:50:00	2	10	BA0189	140.6	138.25	107	100.45	69.5	56.2	86.45	142.65	577	0.25
BA-05	2007-07-23	09:45:00	2	10	BA0190	130.1	129	98.3	95.85	65.5	56	75.1	131.1	430	0
BA-01	2007-07-30	07:35:00	2	12	BA0191	139	136.9	108.4	104.75	73.5	58.65	86.1	144.75	588	0.167
BA-05	2007-05-29	10:07:00	1	6	BA0200	107.85	106.85	85.3	82	57	43	62.15	105.15	275	0
BA-01	2007-06-11	07:17:00	1	7	BA0202	114.55	113.85	86.45	82.15	57	47.25	70.35	117.6	310	0
BA-01	2007-05-14	09:56:00	3		BA0203	134.8	134.8	104	102.2	62.5	54.15	81	135.15	530	0
BA-01	2007-05-14	09:56:00	2	12	BA0205	149.75	145.8	118.15	108.35	76.5	61.75	89.25	151	720	0
BA-02	2007-05-29	08:05:00	2	12	BA0206	152.35	149.4	119.6	114.75	77	65.3	88	153.3	740	0.25
BA-03	2007-07-02	09:22:00	1	4	BA0207	82.25	80.3	63.8	61.2	42.45	34.9	51.6	86.5	108	0
BA-02	2007-07-09	08:42:00	3	10	BA0210	143.75	142.4	104.4	92.9	65.5	60	80.4	140.4	525	0.25
BA-03	2007-07-09	09:20:00	3		BA0240	140.15	140.15	110	104.5	70	57.65	84.9	142.55	565	0.25
BA-05	2007-07-02	11:23:00	2	14	BA0258	150.5	148.35	108.85	98.7	71.5	62.4	82.1	144.5	640	0.25
BA-03	2007-05-21	10:15:00	2	12	BA0301	145.9	145.25	113.7	108.45	79	60.5	81.7	142.2	675	0.25
BA-03	2007-05-14	13:30:00	3		BA0302	131.2	123.05	103.8	98.55	63	51.9	77.15	129.05	454	0.5
BA-01	2007-05-14	08:50:00	3	11	BA0400	133.25	131.5	104	98.5	68	58.3	81.3	139.6	565	0.416
BA-03	2007-07-18	08:45:00	1	6	BA0500	92.9	89.2	74.3	72.85	47.65	38.8	56.1	94.9	153	0.417
BA-03	2007-07-09	09:38:00	3	13	BA0501	142	140.85	106.8	103.5	73	57.6	85.35	142.95	632	0.417
BA-03	2007-05-29	09:10:00	3		BA0506	136.65	136.65	114.2	105.85	69.5	56.6	82.25	138.85	550	0.417
BA-02	2007-07-30	08:25:00	3		BA0605	145	142.9	112.05	100.55	66	58.7	81.75	140.45	560	0.333
BA-01	2007-07-30	07:08:00	2	11	BA1189	131.3	129.55	102.75	92	64.5	53.25	75	128.25	418	0.083
PF-01	2007-05-15	07:34:00	1	8	PF0146	136.6	136.6	101.5	98.05	66.5	56.35	80.6	136.95	502	0
PF-01	2007-05-15	07:58:00	2	12	PF0158	124.3	125.1	93.4	90.05	63	47.3	74.15	121.45	430	0
PF-03	2007-05-15	10:40:00	1	7	PF0252	121.35	119.5	89.7	81.25	57	49.85	68.55	118.4	315	0.083
PF-05	2007-05-15	12:25:00	2	10	PF0253	151.6	151.15	113.8	100.4	70	55.2	59.65	144.85	620	0
PF-01	2007-05-22	08:30:00	1	9	PF0254	140.25	135	102.1	95.65	67	54.65	80.6	135.25	495	0
PF-03	2007-05-22	10:11:00	2	10	PF0255	139.7	138	104.1	99.4	71	55.9	81.3	137.2	572	0
PF-01	2007-05-30	07:40:00	1	9	PF0256	138.65	136.05	101.45	94.85	65	56.65	81.05	137.7	506	0
PF-01	2007-05-30	08:25:00	2	10	PF0257	138.6	137.6	105.7	98.4	69.5	56.75	77.8	134.55	550	0
PF-05	2007-05-30	10:50:00	2	11	PF0258	141.45	139.25	105.2	101.65	68.5	60	81.4	141.4	492	0
PF-05	2007-05-30	10:50:00	2	13	PF0260	138.55	137.2	102.45	96.35	65.5	54.9	79.85	134.75	527	0.333
PF-01	2007-06-05	06:57:00	2	14	PF0262	141.55	141.4	111.1	102.9	73	53.15	86.35	139.5	670	0
PF-01	2007-06-12	07:23:00	2	11	PF0263	144.15	140.65	110.55	106.15	75	59.8	89.85	149.65	648	0
PF-01	2007-06-12	08:00:00	2	12	PF0264	140.6	138.75	108.65	107.65	68	58.85	81.35	140.2	545	0
PF-02	2007-06-12	08:41:00	2	12	PF0265	145.8	143	108.4	100.4	70	58.35	81.8	140.15	555	0.083
PF-04	2007-06-12	10:36:00	1	7	PF0266	106.7	105.3	81.7	81.2	53	43.65	61.85	105.5	235	0
PF-03	2007-06-20	09:24:00	2	10	PF0267	143.8	142	110.5	106.6	74	58.75	81.65	140.4	660	0.083
PF-05	2007-06-12	11:25:00	3	12	PF0268	140.85	140.85	110.65	105.35	74	57.1	83.55	140.65	622	0
PF-04	2007-06-20	10:10:00	2	15	PF0269	141.95	138.85	113.4	105.65	71	56	83.85	139.85	590	0
PF-05	2007-05-30	11:24:00	1	6	PF0270	102.6	100.75	76.8	70.85	55	42	60.55	102.55	208	0.167
PF-01	2007-06-26	07:19:00	2	11	PF0271	141	139.45	103.75	96.3	66.5	54.5	83.25	137.75	496	0.083
PF-01	2007-06-26	08:00:00	1	7	PF0272	111.4	108.25	81.65	81.1	54	46.7	61.25	107.95	254	0.083
PF-02	2007-06-26	09:00:00	2	13	PF0275	144.55	139	118.4	102.2	69.5	53.9	85.85	139.75	586	0.25
PF-03	2007-06-26	09:35:00	3		PF0276	139.3	138.2	106.8	96.95	75	57.15	89.1	146.25	670	0
PF-03	2007-06-26	09:15:00	2	12	PF0277	127.2	125.8	96.35	93.75	66	51.8	76.25	128.05	422	0.083
PF-03	2007-06-26	09:15:00	2	10	PF0278	137.35	135.3	107.15	98.4	64.5	55.6	78.6	134.2	520	0
PF-04	2007-06-26	11:01:00	2	11	PF0279	132.55	130.75	105	101	64.5	55.3	71.85	127.15	423	0
PF-01	2007-07-03	07:32:00	2	8	PF0282	129.2	127.4	97	93.9	64.5	50.6	74.75	125.35	455	0
PF-01	2007-07-03	07:47:00	3	12	PF0283	133	130.4	99	96	70	54.5	80	134.5	490	0.417
PF-03	2007-07-03	09:33:00	2	13	PF0284	137.3	135.4	100.75	99	66	54.4	78.2	132.6	535	0
PF-03	2007-07-03	09:33:00	2	10	PF0285	136.3	135	108.8	106	68	56.9	83.4	140.3	585	0
PF-03	2007-07-03	10:05:00	2	13	PF0286	143	141	114.2	111.1	72	53.8	89.6	143.4	672	0
PF-04	2007-07-03	10:32:00	2	10	PF0287	132.55	129.8	102.2	95.05	63.5	51.85	79.1	130.95	450	0
PF-01	2007-07-10	07:09:00	2	11	PF0288	135.3	131.7	102.65	92.9	64	52.8	80.3	133.1	445	0
PF-01	2007-07-10	07:35:00	2	12	PF0289	141.6	141.6	106.6	105	68	58.8	83.05	141.85	542	0.083
PF-02	2007-07-10	08:49:00	1	8	PF0290	112.25	110.85	88.25	86.35	59	44.4	68.7	113.1	296	0
PF-04	2007-07-10	10:31:00	2	11	PF0291	130.85	130.85	102	93.6	65	51.65	74.25	125.9	455	0
PF-05	2007-07-10	11:22:00	2	12	PF0292	131.2	130.55	101.8	91.8	66	55.05	78.35	133.4	468	0.083
PF-01	2007-07-17	07:06:00	2	11	PF0293	140.7	139.15	102.35	97	71	57.7	81.35	139.05	518	0.75
PF-05	2007-07-17	11:44:00	2	11	PF0295	136.4	135.2	107.3	102.55	71	55.45	81.85	137.3	550	0
PF-04	2007-07-24	10:10:00	1	9	PF0296	126.1	124.3	100.7	96.8	66	52	76.2	128.2	432	0
PF-05	2007-07-24	10:47:00	3		PF0297	139.2	138.4	105	102.35	68	56.05	79.65	135.7	510	0.333
PF-04	2007-07-24	09:53:00	3		PF0298	138.2	135.5	105.25	103.7	69.5	56.2	82.55	138.75	580	0.833
PF-03	2007-06-12	09:55:00	1	3	PF0301	75.45	75.45	61.2	58.85	38.7	32.7	43.85	76.55	82	0
PF-03	2007-06-26	10:09:00	1	4	PF0302	87.4	85.7	70.9	68.8	44.5	36.4	50.25	86.65	127	0.167
PF-01	2007-07-03	07:46:00	3		PF0303	131.85	130	100.3	93.8	67.5	54.2	71.45	125.65	520	0.333
PF-03	2007-07-10	09:50:00	1	3	PF0304	79.85	78.6	65.9	63.9	43.85	33.75	51.65	85.4	123	0
PF-01	2007-07-17	07:26:00	1	5	PF0305	93.3	92.2	74.65	72.6	45	38.3	54.8	93.1	154	0
PF-03	2007-07-24	09:02:00	1	4	PF0306	98.25	96.9	77.8	74.9	50	40.4	60.25	100.65	188	0
PF-01	2007-07-17	07:35:00	2	14	PF0307	131.85	129.45	104.4	95.5	69.5	55.1	75.55	130.65	540	0.333
PF-05	2007-07-24	11:03:00	1	7	PF0308	115.1	113.05	90.5	84.2	59.5	41.75	68	109.75	306	0
PF-01	2007-06-20	07:18:00	3		PF0505	139.05	137.75	108.6	105.4	71	57.15	83.35	140.5	595	0.833
PF-05	2007-07-17	11:18:00	2	12	PF0572	135.25	133.95	101.75	95.2	64	55	80.9	135.9	490	0.333
PF-03	2007-06-12	09:55:00	1	6	PF0701	106.25	104.2	86.45	82.05	52	43.4	62.85	106.25	235	0.5
PF-01	2007-07-10	08:02:00	3		PF0711	120	118.5	91.75	87.5	63.5	50.85	71.65	122.5	410	0.417
PF-03	2007-07-24	09:23:00	1	3	PF9999										0.5
